# Supplementary material for: N-glycosylation of ICAM-2 is required for ICAM-2-mediated complete suppression of metastatic potential of SK-N-AS neuroblastoma cells
Source: Springer Nature journal article supplement (doi:10.1186/1471-2407-13-261), 2013-05-28

Colony Numbers

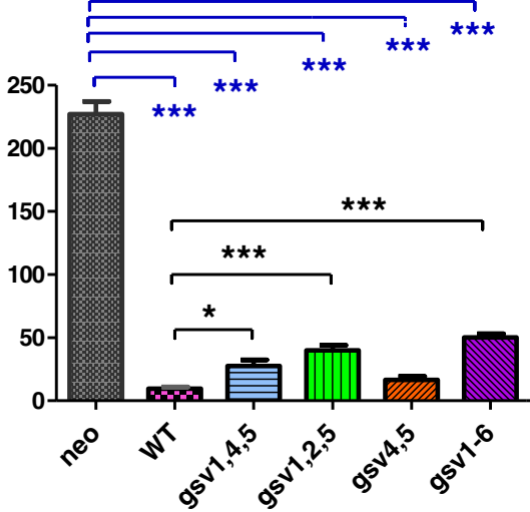

Supplement: 12885_2012_3945_MOESM6_ESM.pdf [file 12885_2012_3945_MOESM6_ESM.pdf]
